# Supplementary material
Source: PubMed Central journal article supplement (PMC3278239)
Supplement: supp_111.020719_Tables1-4.pdf [file supp_111.020719_Tables1-4.pdf]

## Online Supplemental Material

### **Longitudinal trends in diet and effects of sex, race, and education on dietary quality score change: the Coronary Artery Risk Development in Young Adults study.**

Femke PC Sijtsma, Katie A Meyer, Lyn M Steffen, James M Shikany, Linda van Horn, Lisa Harnack, Daan Kromhout, David R Jacobs, Jr

Details about the investigator ratings of food groups and the CARDIA *a priori* diet score assignment derived from the investigator ratings are in **Supplemental table 1**. Between studies there exist food grouping differences, and few differences in ratings; generally the investigator opinion agreed very closely.

Black participants and those with less educational attainment generally showed more change than whites and more highly educated participants, but this pattern varied across food groups. Those demographic interactions which reached the Bonferroni corrected p-value of  $<0.0012$  are indicated in **Supplemental table 2** we considered race and sex differences and education differences, but not race, sex, and education differences.

Differences among demographic groups, **Supplemental table 3** (by race and sex) **and 4** (by education), were especially prominent and significant for the negative rated food groups. For most food groups changes were in the same direction for both demographic groups however one demographic group showed a larger increase or decrease compared to the other demographic groups.

**Supplemental Table 1**  
**Investigator ratings of food groups and comparability to previous studies.**

| CARDIA FOOD GROUPS     | Investigators' independent ratings |     |     |     | CARDIA a priori score | Previous studies' consensuses |                               |                            |
|------------------------|------------------------------------|-----|-----|-----|-----------------------|-------------------------------|-------------------------------|----------------------------|
|                        | FPCS                               | JAN | DRJ | LMS |                       | Nettleton et.al. <sup>1</sup> | Lockheart et al. <sup>2</sup> | Jacobs et al. <sup>3</sup> |
| Avocado                | +                                  | +   |     |     | +                     | +                             | +                             | +                          |
| Beans                  | +                                  | +   |     |     | +                     | +                             |                               | +                          |
| Beer                   | +                                  | +   | +   | +   | +                     | +                             | +                             | +                          |
| Coffee                 | +                                  | +   | -   | -   | +                     | +                             | 0                             | -                          |
| Fatty fish             | +                                  | +   | +   |     | +                     |                               | +                             | +                          |
| Fruit                  | +                                  | +   | +   | +   | +                     | +                             | +                             | +                          |
| Green vegetables       | +                                  | +   | +   | +   | +                     | +                             | +                             | +                          |
| Lean fish              | +                                  | +   |     |     | +                     | +                             | +                             | +                          |
| Low fat dairy          | +                                  | +   | +   | +   | +                     |                               | +                             | +                          |
| Liquor                 | +                                  | +   | +   | +   | +                     |                               | +                             | +                          |
| Oil                    | +                                  | +   | +   | +   | +                     | +                             | +                             | +                          |
| Other vegetables       | +                                  | +   | +   | +   | +                     | +                             | +                             | +                          |
| Poultry                | +                                  | 0   | +   | +   | +                     | +                             | +                             | +                          |
| Seeds nuts             | +                                  | +   | +   | +   | +                     | +                             |                               | +                          |
| Soy products           | +                                  | +   |     |     | +                     | +                             |                               |                            |
| Tea                    | +                                  | +   | +   | +   | +                     | +                             | +                             | +                          |
| Tomato                 | +                                  | +   | +   | +   | +                     | +                             | +                             | +                          |
| Whole grains           | +                                  | +   | +   | +   | +                     | +                             | +                             | +                          |
| Wine                   | +                                  | +   | +   | +   | +                     | +                             | +                             | +                          |
| Yellow vegetables      | +                                  | +   | +   | +   | +                     | +                             | +                             | +                          |
| Butter                 | -                                  | -   | -   | -   | -                     |                               | -                             | -                          |
| Fried poultry and fish | -                                  | -   |     |     | -                     |                               |                               |                            |
| Fried potato           | -                                  | -   |     |     | -                     | -                             | -                             |                            |
| Grain dessert          | -                                  | -   |     |     | -                     | -                             |                               |                            |
| Organ meat             | -                                  | -   | -   | -   | -                     | 0                             | -                             | -                          |
| Processed meat         | -                                  | -   | -   | -   | -                     | -                             | -                             | -                          |
| Regular red meat       | -                                  | -   | -   | -   | -                     |                               | -                             | -                          |
| Salty snacks           | -                                  | -   | -   | -   | -                     | -                             | -                             | -                          |
| Sauces                 | 0                                  | -   | +   | +   | -                     |                               | +                             | +                          |
| Soft drinks            | -                                  | -   | -   | -   | -                     | -                             | -                             | -                          |
| Sweet breads           | -                                  | -   |     |     | -                     | -                             |                               | -                          |
| Sweet extra's          | -                                  | -   | -   | -   | -                     | -                             | -                             | -                          |
| Whole fat dairy        | -                                  | -   | -   | -   | -                     | -                             | -                             | -                          |
| Chocolate              | 0                                  | 0   |     |     | 0                     | 0                             | -                             | -                          |

|                   |   |   |   |     |          |   |   |   |
|-------------------|---|---|---|-----|----------|---|---|---|
| Diet soft drink   | 0 | 0 | + | -,+ | <b>0</b> | 0 | 0 | + |
| Eggs              | 0 | 0 |   |     | <b>0</b> | 0 | 0 | 0 |
| Fruit juice       | 0 | 0 | - | -   | <b>0</b> |   | - | - |
| Lean red meat     | + | 0 |   | +   | <b>0</b> | 0 | 0 | + |
| Margarine         | 0 | 0 |   |     | <b>0</b> |   |   |   |
| Meal replacements | 0 | 0 |   |     | <b>0</b> | 0 |   |   |
| Pickled food      | 0 | 0 |   |     | <b>0</b> |   |   |   |
| Potatoes          | 0 | 0 |   |     | <b>0</b> | 0 | 0 | 0 |
| Refined grains    | 0 | 0 |   |     | <b>0</b> | 0 | 0 | 0 |
| Shellfish         | + | 0 |   |     | <b>0</b> |   |   |   |
| Soups             | 0 | 0 | + | +   | <b>0</b> | + | + | + |
| Sugar substitutes | 0 | 0 |   |     | <b>0</b> |   |   |   |

---

<sup>1</sup>Nettleton JA, Schulze MB, Jiang R, Jenny NS, Burke GL, Jacobs DR, Jr. *A priori*-defined dietary patterns and markers of cardiovascular disease risk in the multi-ethnic study of atherosclerosis (MESA). *Am J Clin Nutr.* 2008 Jul;88(1):185-94.

<sup>2</sup>Lockheart MS, Steffen LM, Rebnord HM, Fimreite RL, Ringstad J, Thelle DS, et al. Dietary patterns, food groups and myocardial infarction: A case-control study. *Br J Nutr.* 2007 Aug;98(2):380-7.

<sup>3</sup>Jacobs DR Jr, Sluik D, Rokling-Andersen MH, Anderssen SA, Drevon CA. Association of 1-y changes in diet pattern with cardiovascular disease risk factors and adipokines: results from the 1-y randomized Oslo Diet and Exercise Study. *Am J Clin Nutr.* 2009 Feb;89(2):509-17. Epub 2008 Dec 30.

**Supplemental Table 2**

**Changes in food groups, grouped according to their rating in the *a priori* diet score, with notations of substantial race-sex and educational attainment differences in change pattern, CARDIA 1985-86 to 2005-06**

| <b>Food group</b>       | <b>mean<br/>sv/d<br/>y0</b> | <b>mean<br/>sv/d<br/>y7</b> | <b>mean<br/>sv/d<br/>y20</b> | <b>mean<br/>change<br/>(20 -0)</b> | <b>% change<br/>20 -0/ 0</b> | <b>p-trend</b> | <b>Demographic groups showing<br/>exceptions to the overall trend<br/>(p&lt;0.0012 for interaction)</b> |
|-------------------------|-----------------------------|-----------------------------|------------------------------|------------------------------------|------------------------------|----------------|---------------------------------------------------------------------------------------------------------|
| <b>Positively rated</b> |                             |                             |                              |                                    |                              |                |                                                                                                         |
| Avocado                 | 0.08                        | 0.08                        | 0.15                         | 0.07                               | 88%                          | <0.0001        | Race-sex: White ♀ 0.12, others 0.04                                                                     |
| Beans                   | 0.21                        | 0.26                        | 0.25                         | 0.04                               | 19%                          | <0.0001        | Race: White 0.07, Black 0.01<br>Education: 13+ 0.05, ≤13 -0.04                                          |
| Beer                    | 0.52                        | 0.49                        | 0.31                         | -0.21                              | -40%                         | <0.0001        | Sex: ♂ -0.36, ♀ -0.06                                                                                   |
| Coffee                  | 1.12                        | 1.22                        | 1.47                         | 0.35                               | 31%                          | <0.0001        | Sex: ♂ 0.5, ♀ 0.22                                                                                      |
| Fatty fish              | 0.04                        | 0.05                        | 0.02                         | -0.02                              | -50%                         | <0.0001        |                                                                                                         |
| Fruit                   | 1.43                        | 1.66                        | 1.67                         | 0.24                               | 17%                          | <0.0001        | Sex: ♂ 0.13, ♀ 0.32                                                                                     |
| Green vegetables        | 0.37                        | 0.54                        | 0.79                         | 0.42                               | 114%                         | <0.0001        | Sex: ♂ 0.35, ♀ 0.47                                                                                     |
| Lean fish               | 0.70                        | 0.66                        | 0.76                         | 0.06                               | 9%                           | 0.0160         |                                                                                                         |
| Low fat dairy           | 1.16                        | 1.37                        | 1.30                         | 0.14                               | 12%                          | 0.0003         |                                                                                                         |
| Liquor                  | 0.20                        | 0.18                        | 0.20                         | 0.00                               | 0%                           | 0.6400         |                                                                                                         |
| Oil                     | 1.46                        | 3.25                        | 2.75                         | 1.29                               | 88%                          | <0.0001        |                                                                                                         |
| Other vegetables        | 2.10                        | 2.32                        | 2.03                         | -0.07                              | -3%                          | 0.1200         |                                                                                                         |
| Poultry                 | 1.24                        | 1.47                        | 1.45                         | 0.21                               | 17%                          | <0.0001        |                                                                                                         |
| Seeds nuts              | 0.80                        | 0.76                        | 1.15                         | 0.35                               | 44%                          | <0.0001        |                                                                                                         |
| Soy products            | 0.23                        | 0.63                        | 0.79                         | 0.56                               | 243%                         | <0.0001        | Sex: ♂ 0.42, ♀ 0.65                                                                                     |
| Tea                     | 0.61                        | 0.47                        | 0.69                         | 0.08                               | 13%                          | 0.3100         |                                                                                                         |
| Tomato                  | 0.49                        | 0.64                        | 0.54                         | 0.05                               | 10%                          | 0.0002         | Sex: ♂ 0.01, ♀ 0.08                                                                                     |
| Whole grains            | 1.52                        | 1.89                        | 1.61                         | 0.09                               | 6%                           | 0.0030         | Race-Sex: White ♀ 0.29, others 0.02                                                                     |
| Wine                    | 0.16                        | 0.15                        | 0.28                         | 0.12                               | 75%                          | <0.0001        | Race: White 0.25, Black -0.01<br>Education: 13+ 0.15, ≤13 0.0                                           |
| Yellow vegetables       | 0.26                        | 0.25                        | 0.25                         | -0.01                              | -4%                          | 0.2000         |                                                                                                         |

**Negatively rated**

|                        |      |      |      |       |      |         |                                                                                     |
|------------------------|------|------|------|-------|------|---------|-------------------------------------------------------------------------------------|
| Butter                 | 4.78 | 3.88 | 2.11 | -2.67 | -56% | <0.0001 | Race: White -1.7, Black -3.5<br>Sex: ♂ -3.5 ♀ -2.0<br>Education: 13+ -2.2, ≤13 -4.3 |
| Fried poultry and fish | 4.69 | 3.13 | 2.39 | -2.30 | -49% | <0.0001 | Sex: ♂ -2.8 ♀ -1.8                                                                  |
| Fried potato           | 2.37 | 2.03 | 1.40 | -0.97 | -41% | <0.0001 | Race: White -0.7, Black -1.2<br>Sex: ♂ -1.2 ♀ -0.8                                  |
| Grain dessert          | 2.07 | 1.46 | 1.18 | -0.89 | -43% | <0.0001 | Race: White -0.6, Black -1.2<br>Sex: ♂ -1.3 ♀ -0.6                                  |
| Organ meat             | 1.60 | 1.41 | 0.95 | -0.65 | -41% | <0.0001 | Race: White -0.5, Black -0.8                                                        |
| Processed meat         | 1.00 | 0.9  | 0.77 | -0.23 | -23% | <0.0001 | Race: White -0.1, Black -0.4<br>Sex: ♂ -0.4 ♀ -0.1                                  |
| Regular red meat       | 0.36 | 0.29 | 0.18 | -0.18 | -50% | <0.0001 | Race: White -0.1, Black -0.2<br>Sex: ♂ -0.2 ♀ -0.1                                  |
| Salty snacks           | 0.69 | 0.77 | 0.62 | -0.07 | -10% | 0.0040  |                                                                                     |
| Sauces                 | 0.05 | 0.04 | 0.02 | -0.03 | -60% | <0.0001 |                                                                                     |
| Soft drinks            | 0.90 | 0.81 | 0.92 | 0.02  | 2%   | 0.0050  | Race: White 0.23, Black -0.16<br>Education: 13+0.12, ≤13 -0.25                      |
| Sweet breads           | 0.11 | 0.26 | 0.20 | 0.09  | 82%  | <0.0001 | Race: White -0.04, Black 0.22                                                       |
| Sweet extra's          | 1.78 | 1.59 | 1.87 | 0.09  | 5%   | 0.0070  | Education: 13+0.22, ≤13 -0.29                                                       |
| Whole fat dairy        | 0.04 | 0.20 | 0.24 | 0.20  | 500% | <0.0001 |                                                                                     |

**Neutrally rated**

|                 |      |      |      |       |      |         |                                                                                     |
|-----------------|------|------|------|-------|------|---------|-------------------------------------------------------------------------------------|
| Chocolate       | 4.55 | 5.30 | 3.55 | -1.00 | -22% | <0.0001 | Race: White -0.7, Black -1.3<br>Sex: ♂ -1.4 ♀ -0.7                                  |
| Diet soft drink | 1.95 | 1.54 | 1.06 | -0.89 | -46% | <0.0001 |                                                                                     |
| Eggs            | 1.72 | 2.08 | 0.88 | -0.84 | -49% | <0.0001 |                                                                                     |
| Fruit juice     | 0.82 | 0.54 | 0.44 | -0.38 | -46% | <0.0001 | Race: White -0.2, Black -0.6<br>Sex: ♂ -0.8 ♀ -0.4<br>Education: 13+ -0.3, ≤13 -0.7 |
| Lean red meat   | 0.42 | 0.54 | 0.29 | -0.13 | -31% | <0.0001 |                                                                                     |
| Margarine       | 0.68 | 0.57 | 0.61 | -0.07 | -10% | 0.0400  | Sex: ♂ -0.4 ♀ -0.2                                                                  |

|                   |      |      |      |      |       |         |                                                    |
|-------------------|------|------|------|------|-------|---------|----------------------------------------------------|
| Meal replacements | 0.19 | 0.19 | 0.19 | 0.00 | 0%    | 0.8700  |                                                    |
| Pickled food      | 0.23 | 0.24 | 0.24 | 0.01 | 4%    | 0.1100  |                                                    |
| Potatoes          | 0.04 | 0.05 | 0.05 | 0.01 | 25%   | <0.0001 | Education: 13+ 0.02, ≤13 0.0                       |
| Refined grains    | 0.35 | 0.37 | 0.45 | 0.10 | 29%   | <0.0001 |                                                    |
| Shellfish         | 0.01 | 0.05 | 0.14 | 0.13 | 1300% | <0.0001 | Race: White 0.09, Black 0.16<br>Sex: ♂ 0.21 ♀ 0.06 |
| Soups             | 0.38 | 0.72 | 0.64 | 0.26 | 68%   | <0.0001 | Sex: ♂ 0.48 ♀ -0.08                                |
| Sugar substitutes | 0.06 | 0.13 | 0.66 | 0.60 | 1000% | <0.0001 | Race: White 0.4, Black 0.8<br>Sex: ♂ 0.5 ♀ 0.7     |



|                         |      |      |      |      |       |       |       |       |        |         |         |
|-------------------------|------|------|------|------|-------|-------|-------|-------|--------|---------|---------|
| Whole grains            | 1.75 | 1.07 | 1.99 | 1.41 | 0.07  | 0.08  | -0.09 | 0.29  | 0.0035 | 0.8744  | 0.0114  |
| Wine                    | 0.14 | 0.12 | 0.15 | 0.21 | -0.04 | 0.01  | 0.25  | 0.25  | 0.2682 | <0.0001 | 0.2469  |
| Yellow vegetables       | 0.19 | 0.19 | 0.29 | 0.36 | 0.00  | 0.00  | -0.05 | -0.01 | 0.4334 | 0.1135  | 0.3343  |
| <b>Negatively rated</b> |      |      |      |      |       |       |       |       |        |         |         |
| Butter                  | 7.54 | 4.43 | 4.69 | 2.82 | -4.56 | -2.64 | -2.33 | -1.17 | 0.0182 | <0.0001 | <0.0001 |
| Fried poultry and fish  | 0.10 | 0.08 | 0.18 | 0.10 | 0.29  | 0.18  | -0.05 | -0.03 | 0.0098 | <0.0001 | 0.1145  |
| Fried potato            | 0.55 | 0.34 | 0.37 | 0.20 | -0.26 | -0.17 | -0.18 | -0.09 | 0.5511 | <0.0001 | <0.0001 |
| Grain dessert           | 0.96 | 0.64 | 0.71 | 0.49 | -0.02 | -0.16 | 0.01  | -0.03 | 0.1696 | 0.0662  | 0.0605  |
| Organ meat              | 0.07 | 0.07 | 0.03 | 0.02 | -0.02 | -0.03 | -0.02 | -0.01 | 0.1293 | 0.0166  | 0.3857  |
| Processed meat          | 1.59 | 0.89 | 0.82 | 0.39 | -0.18 | -0.11 | 0.25  | 0.21  | 0.4047 | <0.0001 | 0.9513  |
| Regular red meat        | 3.48 | 2.08 | 2.61 | 1.50 | -1.42 | -0.92 | -0.90 | -0.56 | 0.4361 | <0.0001 | <0.0001 |
| Salty snacks            | 0.04 | 0.02 | 0.05 | 0.05 | 0.21  | 0.14  | 0.23  | 0.23  | 0.1512 | 0.0263  | 0.0833  |
| Sauces                  | 5.82 | 4.07 | 5.35 | 3.78 | -2.75 | -1.76 | -2.80 | -1.86 | 0.9159 | 0.9546  | <0.0001 |
| Soft drinks             | 2.29 | 1.89 | 1.41 | 0.83 | -0.70 | -0.75 | -0.56 | -0.39 | 0.1258 | 0.0034  | 0.5266  |
| Sweet breads            | 1.65 | 0.88 | 0.99 | 0.58 | -0.46 | -0.26 | -0.17 | 0.03  | 0.7995 | <0.0001 | <0.0001 |
| Sweet extra's           | 2.56 | 1.76 | 1.85 | 1.05 | 0.16  | 0.20  | -0.09 | 0.28  | 0.2538 | 0.5873  | 0.1220  |
| Whole fat dairy         | 2.85 | 1.79 | 2.28 | 1.49 | -1.51 | -0.85 | -1.01 | -0.26 | 0.7620 | <0.0001 | <0.0001 |
| <b>Neutrally rated</b>  |      |      |      |      |       |       |       |       |        |         |         |
| Chocolate               | 0.20 | 0.20 | 0.18 | 0.18 | 0.00  | -0.05 | 0.06  | 0.01  | 0.6672 | 0.0047  | 0.0114  |
| Diet soft drink         | 0.10 | 0.15 | 0.43 | 0.85 | 0.20  | 0.14  | 0.54  | 0.09  | 0.0013 | 0.0920  | <0.0001 |
| Eggs                    | 1.07 | 0.58 | 0.68 | 0.44 | -0.14 | -0.03 | -0.11 | 0.05  | 0.2433 | 0.0202  | 0.0001  |
| Fruit juice             | 2.69 | 2.04 | 1.78 | 1.33 | -0.99 | -0.94 | -0.68 | -0.77 | 0.5109 | 0.0181  | 0.7050  |
| Lean red meat           | 1.28 | 0.63 | 0.99 | 0.48 | -0.80 | -0.33 | -0.39 | -0.06 | 0.1171 | <0.0001 | <0.0001 |
| Margarine               | 2.14 | 1.65 | 1.79 | 1.36 | -0.85 | -0.71 | -1.01 | -0.73 | 0.1437 | 0.1896  | 0.0758  |
| Meal replacements       | 0.02 | 0.00 | 0.03 | 0.01 | 0.29  | 0.08  | 0.14  | 0.04  | 0.0038 | <0.0001 | <0.0001 |
| Pickled food            | 0.35 | 0.30 | 0.44 | 0.33 | 0.05  | 0.09  | 0.07  | 0.17  | 0.3567 | 0.1715  | 0.0502  |
| Potatoes                | 0.50 | 0.37 | 0.52 | 0.32 | -0.15 | -0.12 | -0.17 | -0.08 | 0.1174 | 0.9251  | 0.0669  |
| Refined grains          | 6.37 | 3.97 | 5.16 | 3.06 | -1.52 | -0.90 | -1.07 | -0.35 | 0.4246 | 0.0002  | <0.0001 |
| Shellfish               | 0.24 | 0.21 | 0.28 | 0.19 | 0.04  | 0.02  | -0.03 | 0.01  | 0.1200 | 0.0516  | 0.7904  |
| Soups                   | 0.03 | 0.03 | 0.05 | 0.04 | 0.02  | 0.01  | 0.02  | 0.02  | 0.2407 | 0.0693  | 0.3845  |
| Sugar substitutes       | 0.01 | 0.05 | 0.06 | 0.12 | 0.25  | 0.49  | 0.61  | 0.91  | 0.6444 | <0.0001 | <0.0001 |



**Supplemental table 4**

**Changes in food groups, grouped according to their rating in the *a priori* diet score, by educational attainment (<13 vs 13+ years of education), CARDIA 1985-86 to 2005-06**

|                         | year 0        |               | year 7        |               | year 20       |               | absolute change <13 | absolute change 13+ | p value interaction <13 vs 13+ |
|-------------------------|---------------|---------------|---------------|---------------|---------------|---------------|---------------------|---------------------|--------------------------------|
|                         | mean sv/d <13 | mean sv/d 13+ | mean sv/d <13 | mean sv/d 13+ | mean sv/d <13 | mean sv/d 13+ |                     |                     |                                |
|                         |               |               |               |               |               |               |                     |                     |                                |
| <b>Positively rated</b> |               |               |               |               |               |               |                     |                     |                                |
| Avocado                 | 0.04          | 0.09          | 0.04          | 0.09          | 0.07          | 0.16          | 0.03                | 0.07                | 0.1685                         |
| Beans                   | 0.27          | 0.20          | 0.30          | 0.25          | 0.23          | 0.25          | -0.04               | 0.05                | 0.0014                         |
| Beer                    | 0.81          | 0.44          | 0.91          | 0.40          | 0.60          | 0.26          | -0.21               | -0.18               | 0.5568                         |
| Coffee                  | 1.04          | 1.15          | 1.20          | 1.22          | 1.30          | 1.50          | 0.26                | 0.35                | 0.1604                         |
| Fatty fish              | 0.04          | 0.04          | 0.04          | 0.06          | 0.02          | 0.02          | -0.02               | -0.02               | 0.5961                         |
| Fruit                   | 1.42          | 1.43          | 1.43          | 1.71          | 1.40          | 1.72          | -0.02               | 0.29                | 0.0055                         |
| Green vegetables        | 0.26          | 0.41          | 0.41          | 0.57          | 0.53          | 0.84          | 0.27                | 0.43                | 0.0012                         |
| Lean fish               | 0.66          | 0.71          | 0.69          | 0.66          | 0.73          | 0.77          | 0.07                | 0.06                | 0.5444                         |
| Low fat dairy           | 1.04          | 1.19          | 1.22          | 1.40          | 1.14          | 1.33          | 0.10                | 0.14                | 0.8740                         |
| Liquor                  | 0.27          | 0.18          | 0.31          | 0.15          | 0.26          | 0.19          | -0.01               | 0.01                | 0.7610                         |
| Oil                     | 1.33          | 1.50          | 3.34          | 3.23          | 2.65          | 2.77          | 1.32                | 1.27                | 0.3422                         |
| Other vegetables        | 2.20          | 2.08          | 2.26          | 2.33          | 1.96          | 2.04          | -0.24               | -0.04               | 0.0376                         |
| Poultry                 | 1.28          | 1.23          | 1.53          | 1.46          | 1.43          | 1.46          | 0.15                | 0.23                | 0.3460                         |
| Seeds nuts              | 0.78          | 0.81          | 0.96          | 0.72          | 0.96          | 1.19          | 0.18                | 0.38                | 0.1215                         |
| Soy products            | 0.24          | 0.23          | 0.80          | 0.59          | 0.90          | 0.77          | 0.66                | 0.54                | 0.1475                         |
| Tea                     | 0.51          | 0.64          | 0.39          | 0.48          | 0.51          | 0.72          | 0.00                | 0.08                | 0.4010                         |
| Tomato                  | 0.46          | 0.49          | 0.58          | 0.65          | 0.48          | 0.55          | 0.02                | 0.06                | 0.8663                         |
| Whole grains            | 1.41          | 1.55          | 1.64          | 1.95          | 1.37          | 1.66          | -0.04               | 0.11                | 0.6243                         |
| Wine                    | 0.12          | 0.17          | 0.08          | 0.17          | 0.12          | 0.32          | 0.00                | 0.15                | 0.0018                         |
| Yellow vegetables       | 0.20          | 0.27          | 0.18          | 0.26          | 0.19          | 0.26          | -0.01               | -0.01               | 0.9574                         |
| <b>Negatively rated</b> |               |               |               |               |               |               |                     |                     |                                |
| Butter                  | 6.47          | 4.31          | 5.50          | 3.53          | 2.18          | 2.09          | -4.29               | -2.22               | <0.0001                        |
| Fried poultry and fish  | 0.16          | 0.10          | 0.44          | 0.22          | 0.26          | 0.18          | 0.10                | 0.08                | 0.4496                         |
| Fried potato            | 0.49          | 0.32          | 0.41          | 0.27          | 0.25          | 0.16          | -0.24               | -0.16               | 0.2088                         |

|                        |      |      |      |      |      |      |       |       |         |
|------------------------|------|------|------|------|------|------|-------|-------|---------|
| Grain dessert          | 0.79 | 0.66 | 0.87 | 0.75 | 0.79 | 0.58 | 0.00  | -0.08 | 0.0686  |
| Organ meat             | 0.07 | 0.04 | 0.07 | 0.03 | 0.04 | 0.02 | -0.03 | -0.02 | 0.2845  |
| Processed meat         | 1.44 | 0.75 | 1.25 | 0.71 | 1.19 | 0.87 | -0.25 | 0.12  | <0.0001 |
| Regular red meat       | 3.09 | 2.17 | 2.98 | 1.83 | 1.79 | 1.32 | -1.30 | -0.85 | 0.0245  |
| Salty snacks           | 0.04 | 0.04 | 0.15 | 0.21 | 0.29 | 0.23 | 0.25  | 0.19  | 0.0016  |
| Sauces                 | 5.13 | 4.57 | 3.78 | 2.99 | 2.57 | 2.36 | -2.56 | -2.21 | 0.2393  |
| Soft drinks            | 2.52 | 1.34 | 2.21 | 1.24 | 1.66 | 0.82 | -0.86 | -0.52 | 0.0157  |
| Sweet breads           | 1.33 | 0.91 | 1.09 | 0.85 | 0.85 | 0.75 | -0.48 | -0.16 | 0.0020  |
| Sweet extra's          | 2.33 | 1.62 | 2.07 | 1.48 | 2.04 | 1.84 | -0.29 | 0.22  | 0.0013  |
| Whole fat dairy        | 2.58 | 1.92 | 1.78 | 1.39 | 1.15 | 1.18 | -1.43 | -0.74 | <0.0001 |
| <b>Neutrally rated</b> |      |      |      |      |      |      |       |       |         |
| Chocolate              | 0.24 | 0.18 | 0.23 | 0.18 | 0.19 | 0.19 | -0.05 | 0.01  | 0.0284  |
| Diet soft drink        | 0.15 | 0.45 | 0.49 | 0.77 | 0.44 | 0.68 | 0.29  | 0.23  | 0.1290  |
| Eggs                   | 0.92 | 0.61 | 0.89 | 0.50 | 0.75 | 0.58 | -0.17 | -0.03 | 0.0342  |
| Fruit juice            | 2.11 | 1.90 | 1.52 | 1.55 | 1.21 | 1.03 | -0.90 | -0.87 | 0.9473  |
| Lean red meat          | 1.11 | 0.74 | 0.76 | 0.50 | 0.39 | 0.45 | -0.72 | -0.29 | <0.0001 |
| Margarine              | 2.09 | 1.61 | 2.55 | 1.98 | 1.05 | 0.85 | -1.04 | -0.76 | 0.1667  |
| Meal replacements      | 0.02 | 0.01 | 0.03 | 0.05 | 0.20 | 0.12 | 0.18  | 0.11  | 0.2217  |
| Pickled food           | 0.37 | 0.35 | 0.41 | 0.36 | 0.40 | 0.46 | 0.03  | 0.11  | 0.1538  |
| Potatoes               | 0.54 | 0.39 | 0.63 | 0.52 | 0.35 | 0.28 | -0.19 | -0.11 | 0.0752  |
| Refined grains         | 5.82 | 4.20 | 6.64 | 5.02 | 4.24 | 3.41 | -1.58 | -0.79 | 0.0294  |
| Shellfish              | 0.21 | 0.23 | 0.20 | 0.25 | 0.17 | 0.25 | -0.04 | 0.02  | 0.0495  |
| Soups                  | 0.04 | 0.04 | 0.05 | 0.05 | 0.04 | 0.06 | 0.00  | 0.02  | <0.0001 |
| Sugar substitutes      | 0.04 | 0.07 | 0.07 | 0.15 | 0.45 | 0.70 | 0.41  | 0.63  | 0.1368  |
